# Supplementary material
Source: Springer Nature journal article supplement (https://www.springermedizin.de/resource/supplementary/12969_2011_789_MOESM2_ESM.pdf/9593022)
Supplement: MOESM2 [file 9593022]

| WHO region                   | Total health workforce |                                | Health service providers |                            | Health management and support workers |                            |
|------------------------------|------------------------|--------------------------------|--------------------------|----------------------------|---------------------------------------|----------------------------|
|                              | Number                 | Density<br>(per 1M population) | Number                   | Total health workforce (%) | Number                                | Total health workforce (%) |
| <b>Africa</b>                | 1,640,000              | 2,300                          | 1,360,000                | 83                         | 280,000                               | 17                         |
| <b>Eastern Mediterranean</b> | 2,100,000              | 4,000                          | 1,580,000                | 75                         | 520,000                               | 25                         |
| <b>South-East Asia</b>       | 7,040,000              | 4,300                          | 4,730,000                | 67                         | 2,300,000                             | 33                         |
| <b>Western Pacific</b>       | 10,070,000             | 5,800                          | 7,810,000                | 78                         | 2,260,000                             | 23                         |
| <b>Europe</b>                | 16,630,000             | 18,900                         | 11,540,000               | 69                         | 5,090,000                             | 31                         |
| <b>Americas</b>              | 21,740,000             | 24,800                         | 12,460,000               | 57                         | 9,280,000                             | 43                         |
| <b>World</b>                 | 59,220,000             | 9,300                          | 39,470,000               | 67                         | 19,750,000                            | 33                         |
